# Supplementary material for: Identification of electroporation sites in the complex lipid organization of the plasma membrane
Source: eLife journal article supplement (doi:10.7554/elife.74773), 2022-02-23

**Histograms for APM.** Histograms showing the values of tested features in nonporated (empty bars) and porated (blue bars) locations. The purple and yellow solid lines show kernel smoothing density estimates. The title above each group of graphs indicates the dataset for which the histograms are shown.

APM - depolarization - inner leaflet

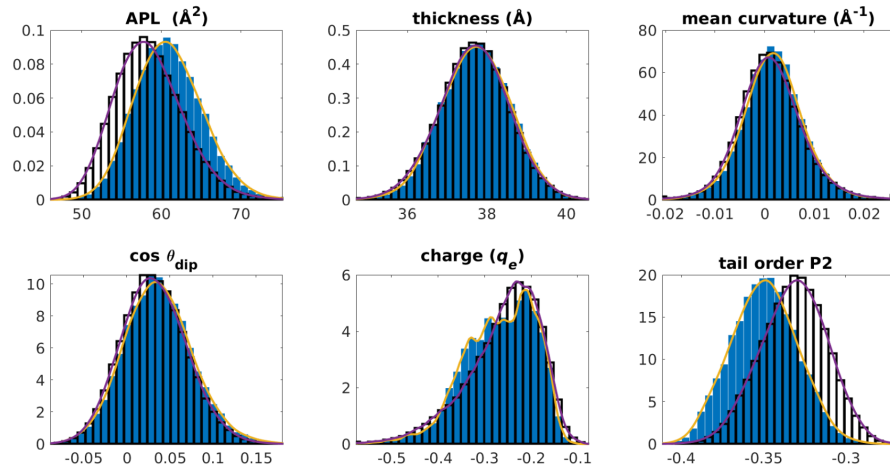

APM - depolarization - outer leaflet

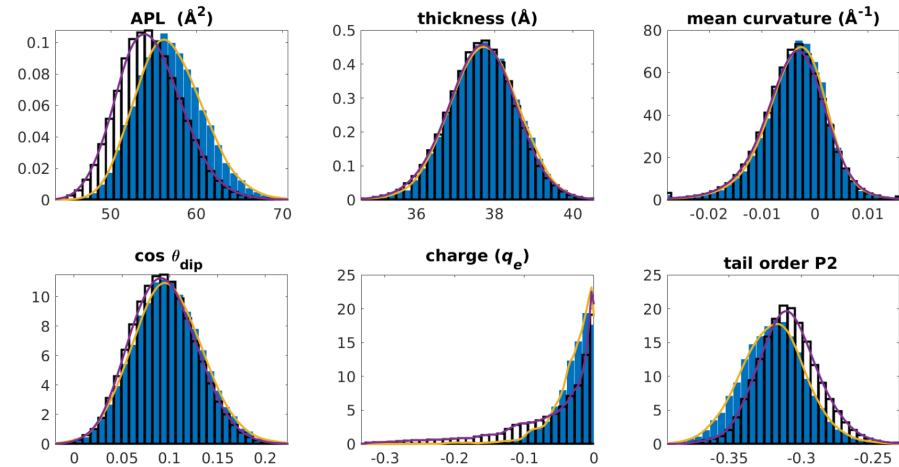

APM - hyperpolarization - inner leaflet

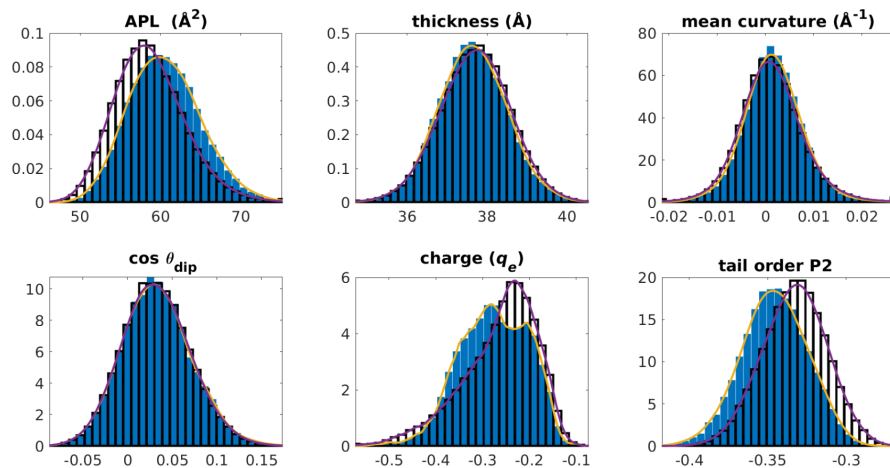

APM - hyperpolarization - outer leaflet

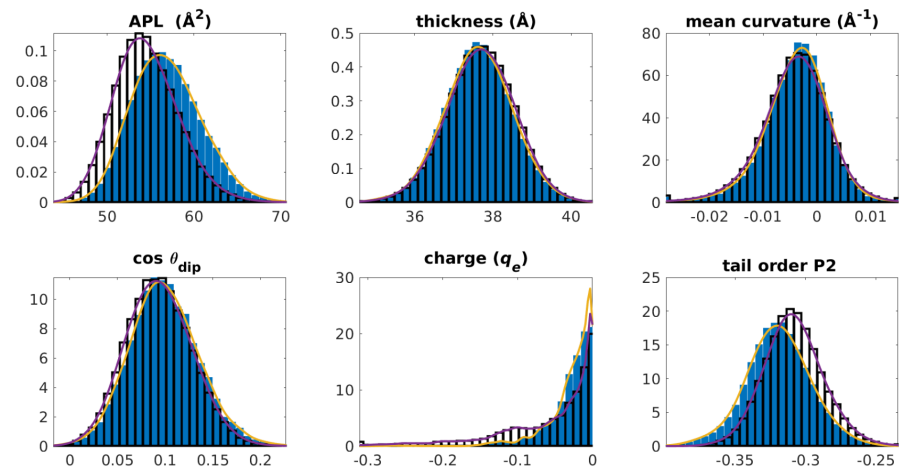

## Histograms for APM - continued.

APM - depolarization - inner leaflet

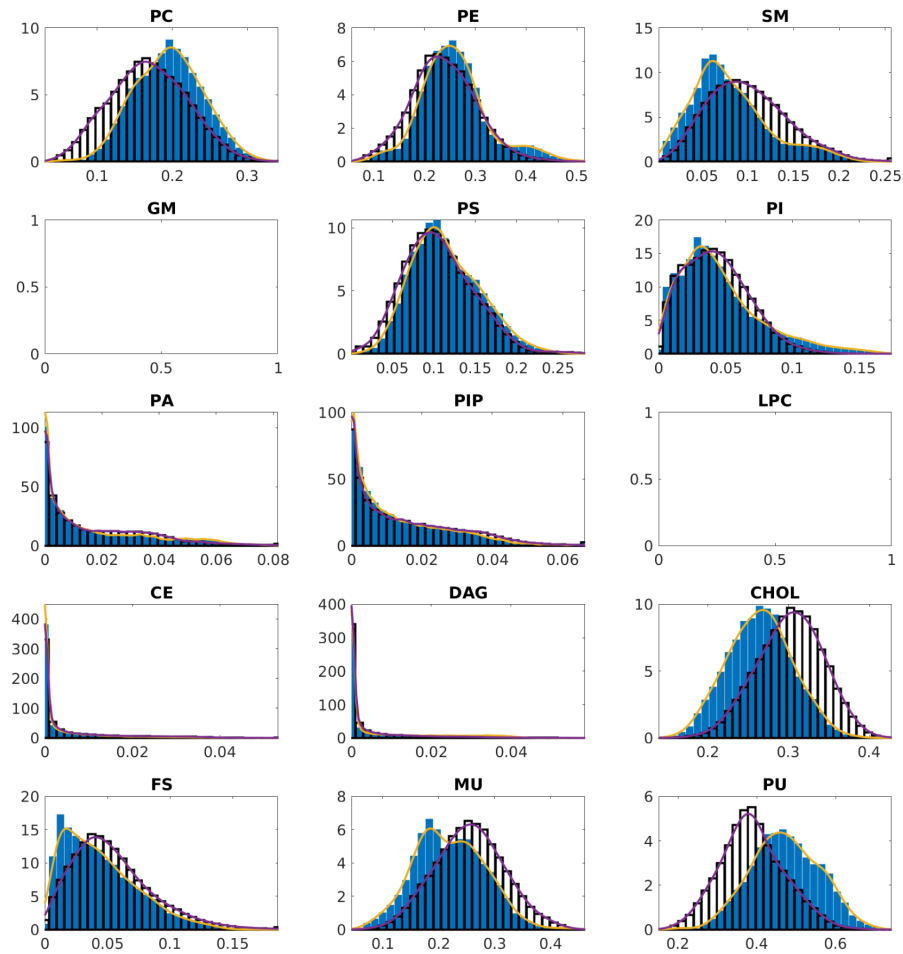

APM - depolarization - outer leaflet

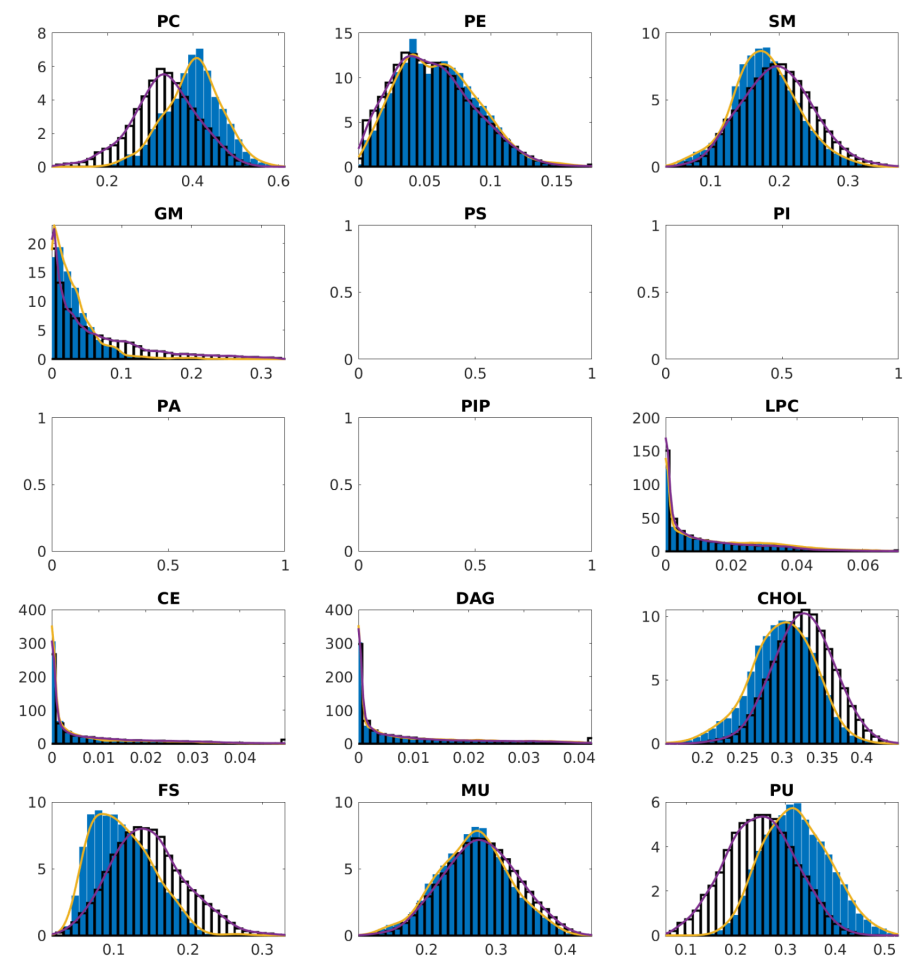

## Histograms for APM - continued.

APM - hyperpolarization - inner leaflet

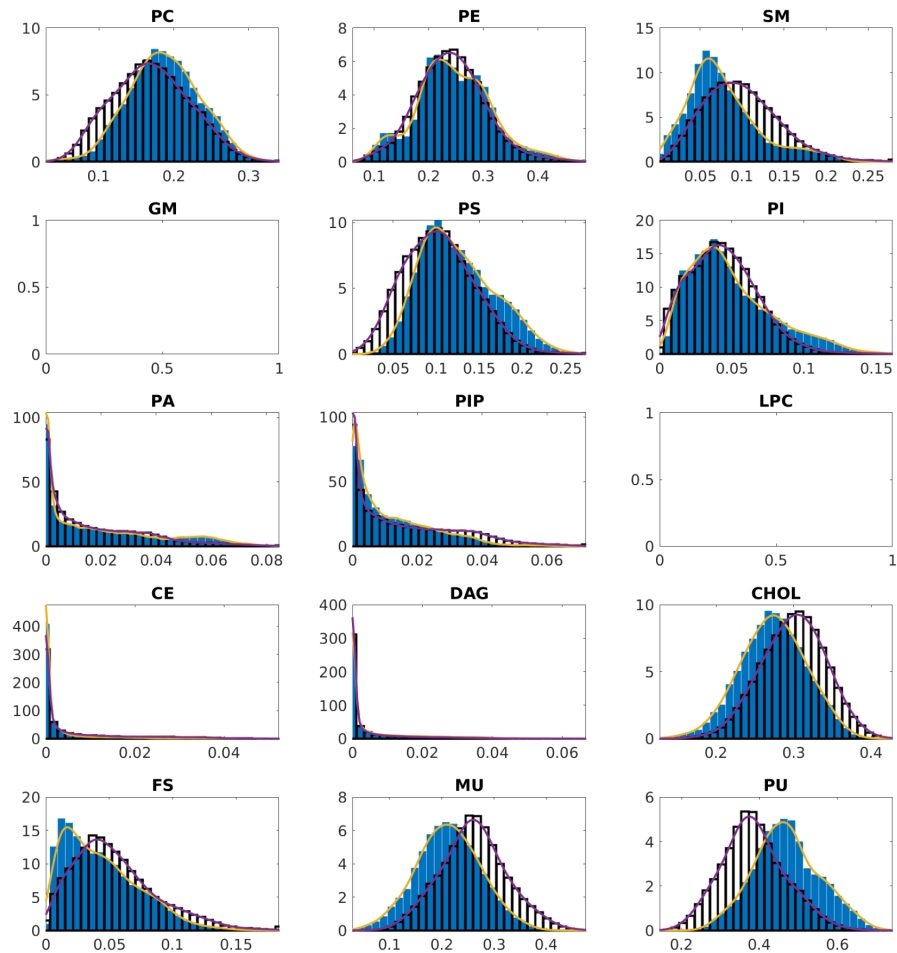

APM - hyperpolarization - outer leaflet

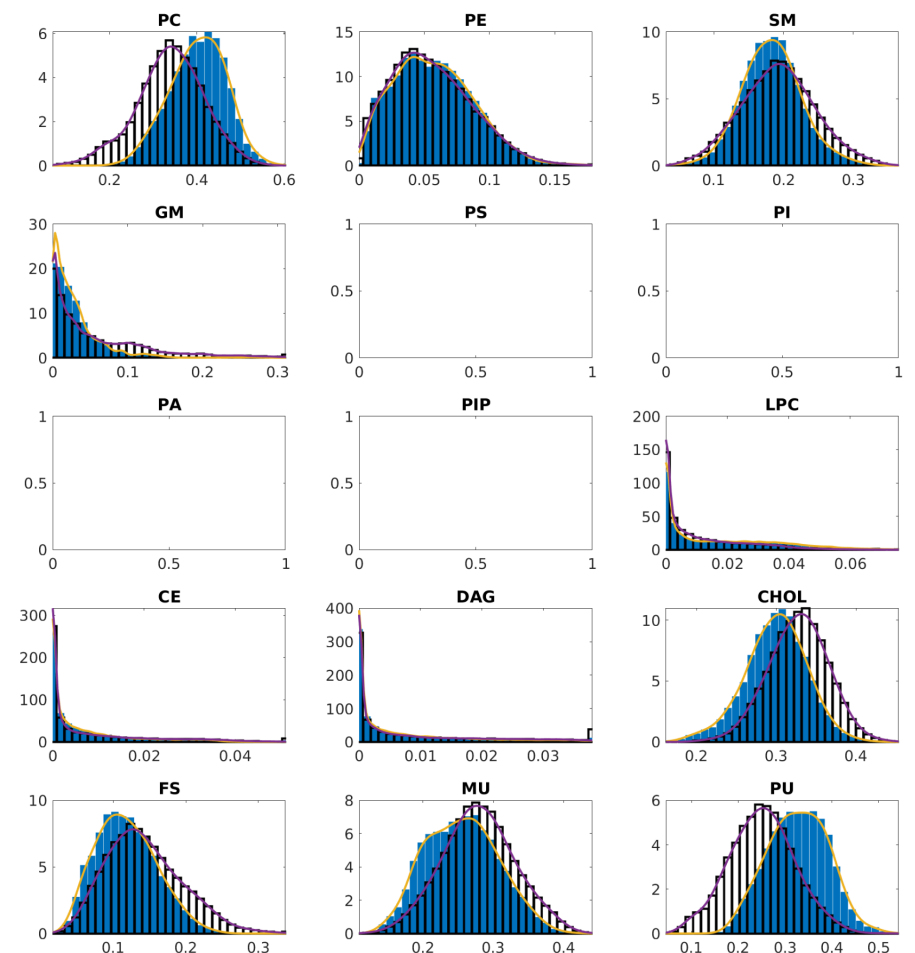

**Histograms for BPM.** Histograms showing the values of tested features in nonporated (empty bars) and porated (blue bars) locations. The purple and yellow solid lines show kernel smoothing density estimates. The title above each group of graphs indicates the dataset for which the histograms are shown.

BPM - depolarization - inner leaflet

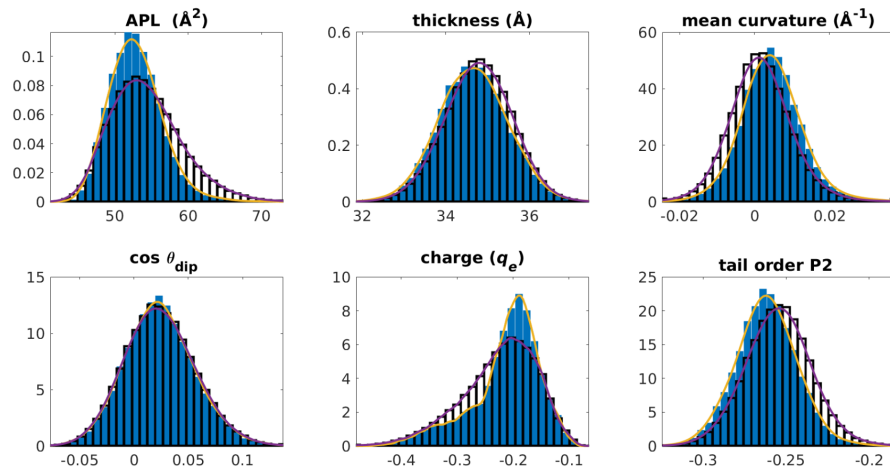

BPM - depolarization - outer leaflet

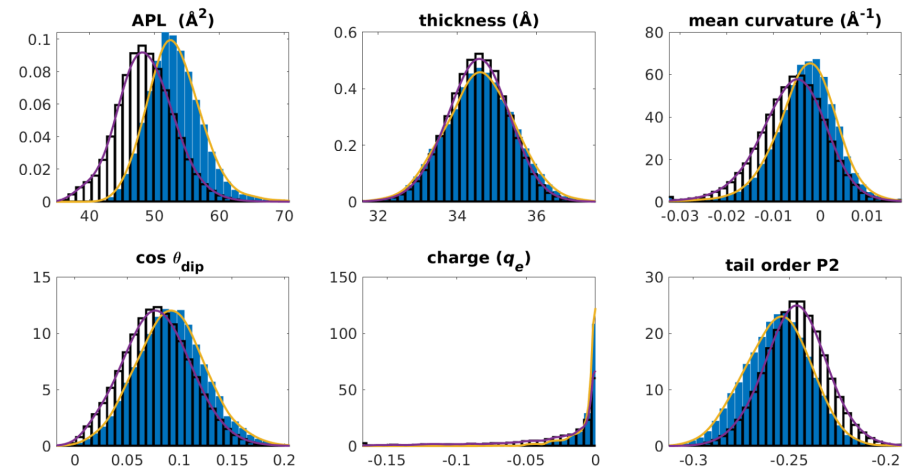

BPM - hyperpolarization - inner leaflet

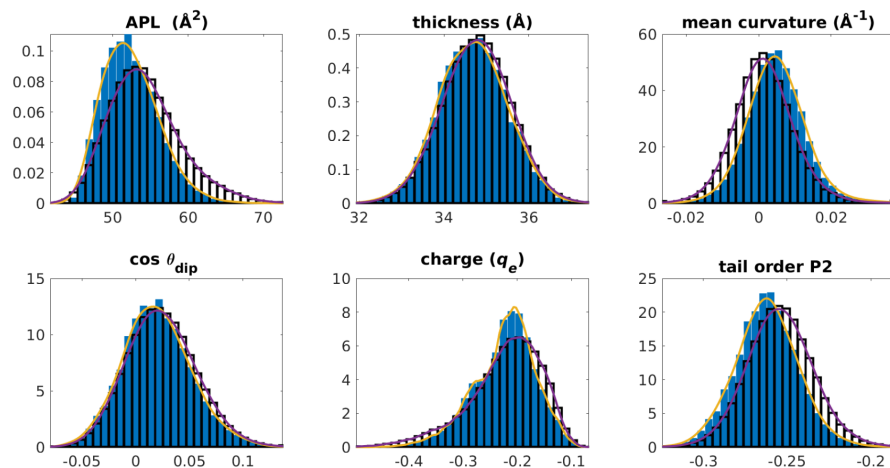

BPM - hyperpolarization - outer leaflet

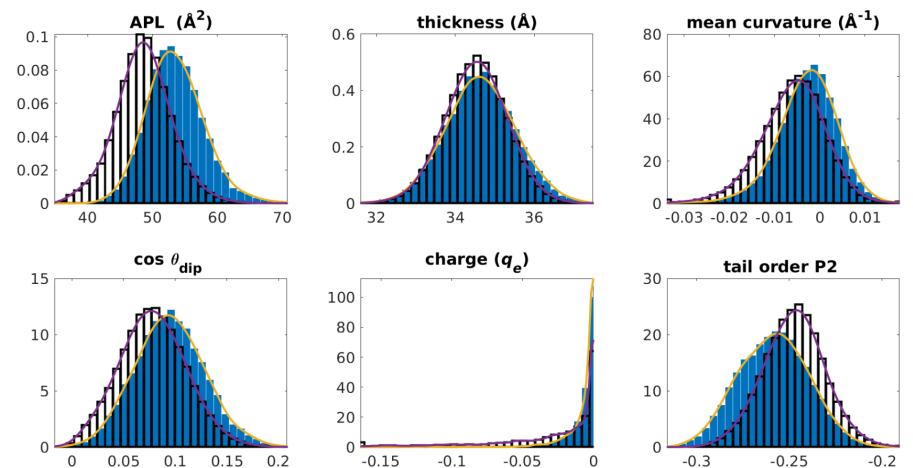

## Histograms for BPM - continued.

BPM - depolarization - inner leaflet

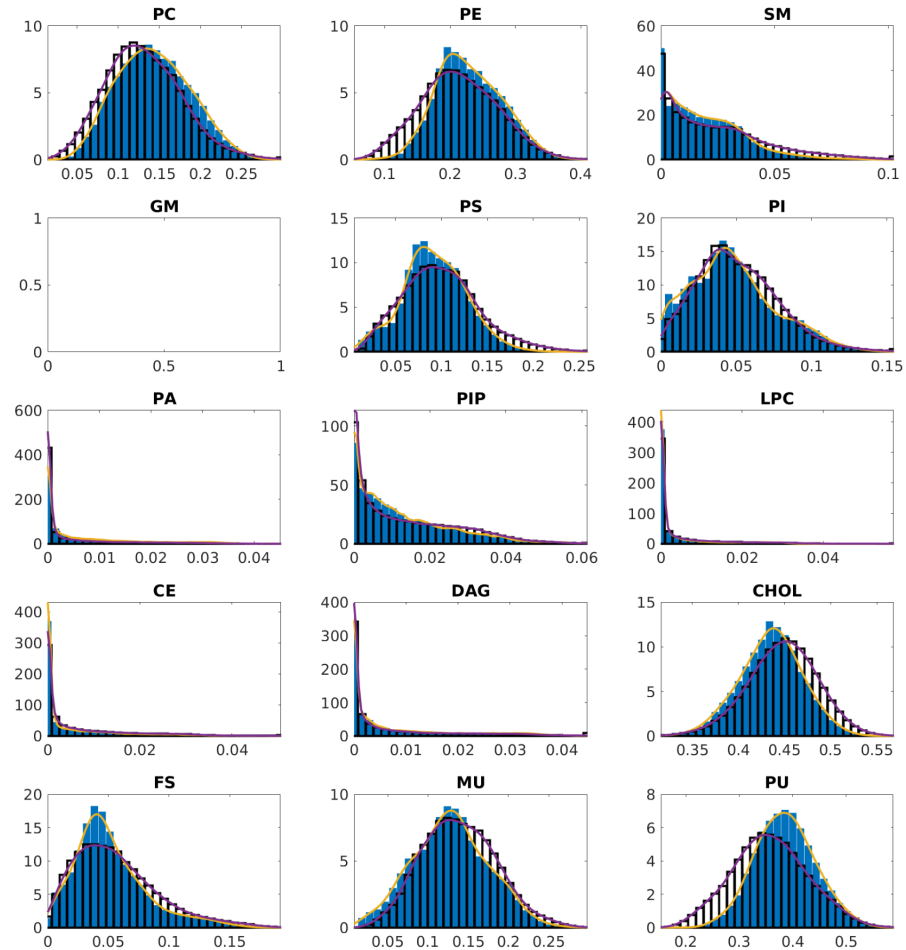

BPM - depolarization - outer leaflet

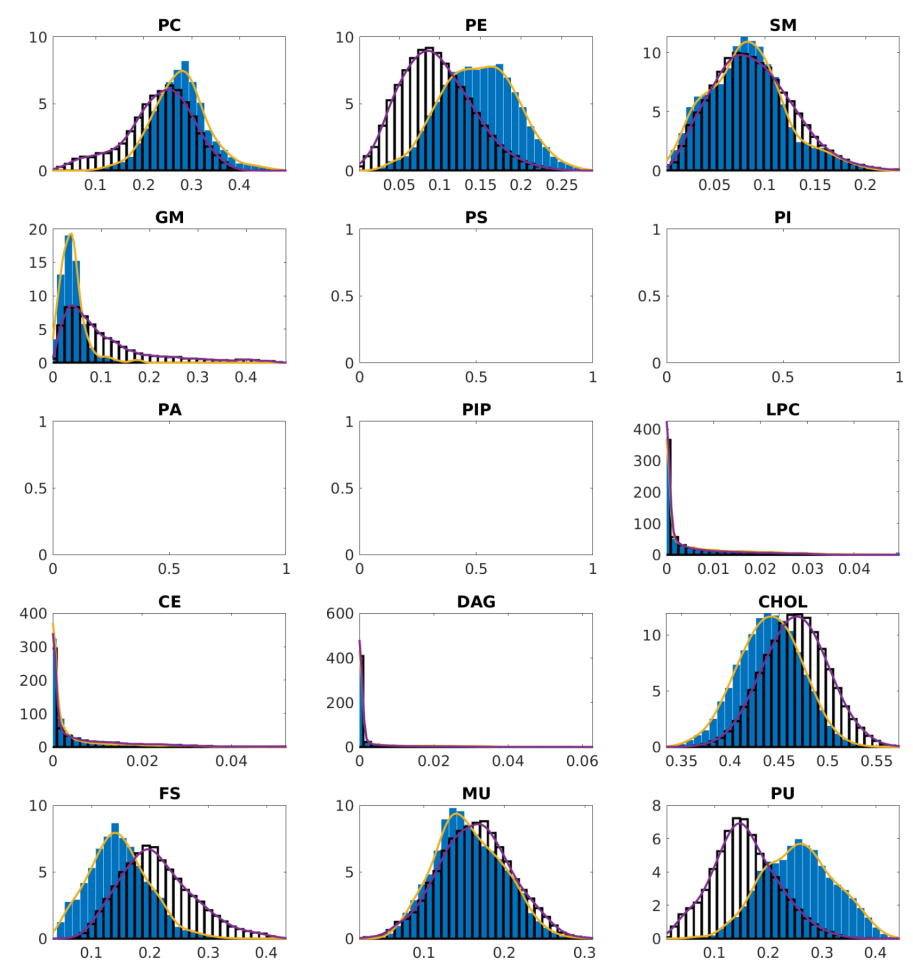

## Histograms for BPM - continued.

BPM - hyperpolarization - inner leaflet

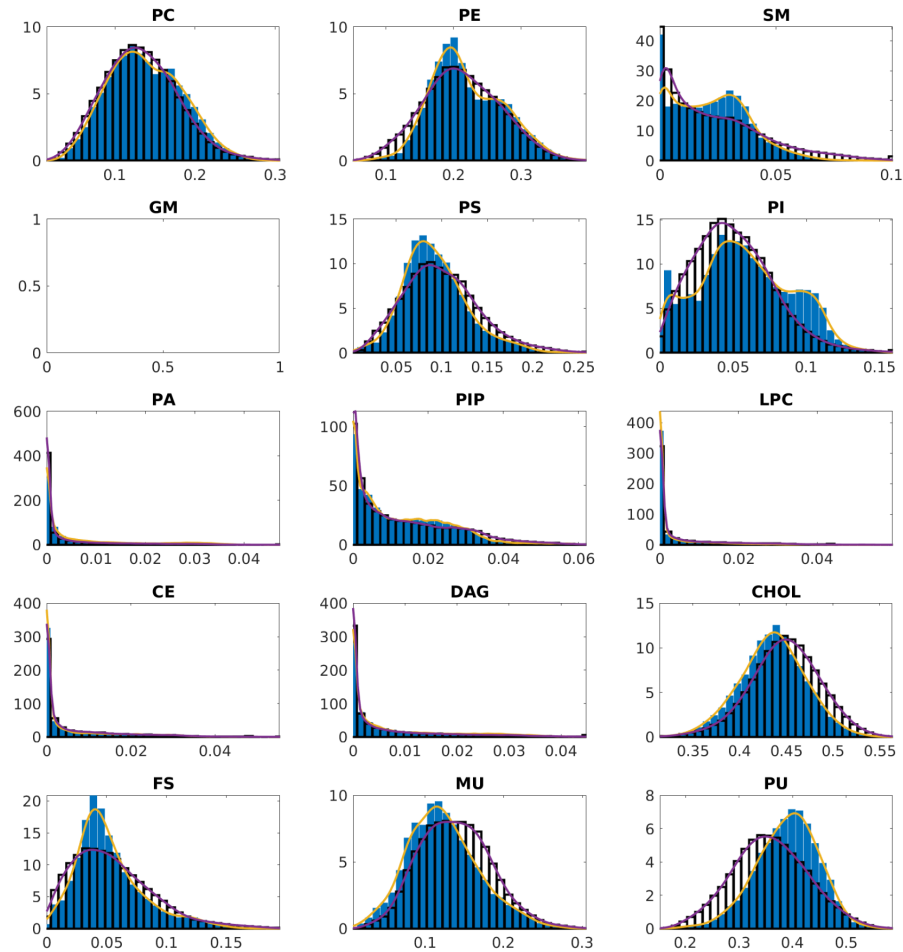

BPM - hyperpolarization - outer leaflet

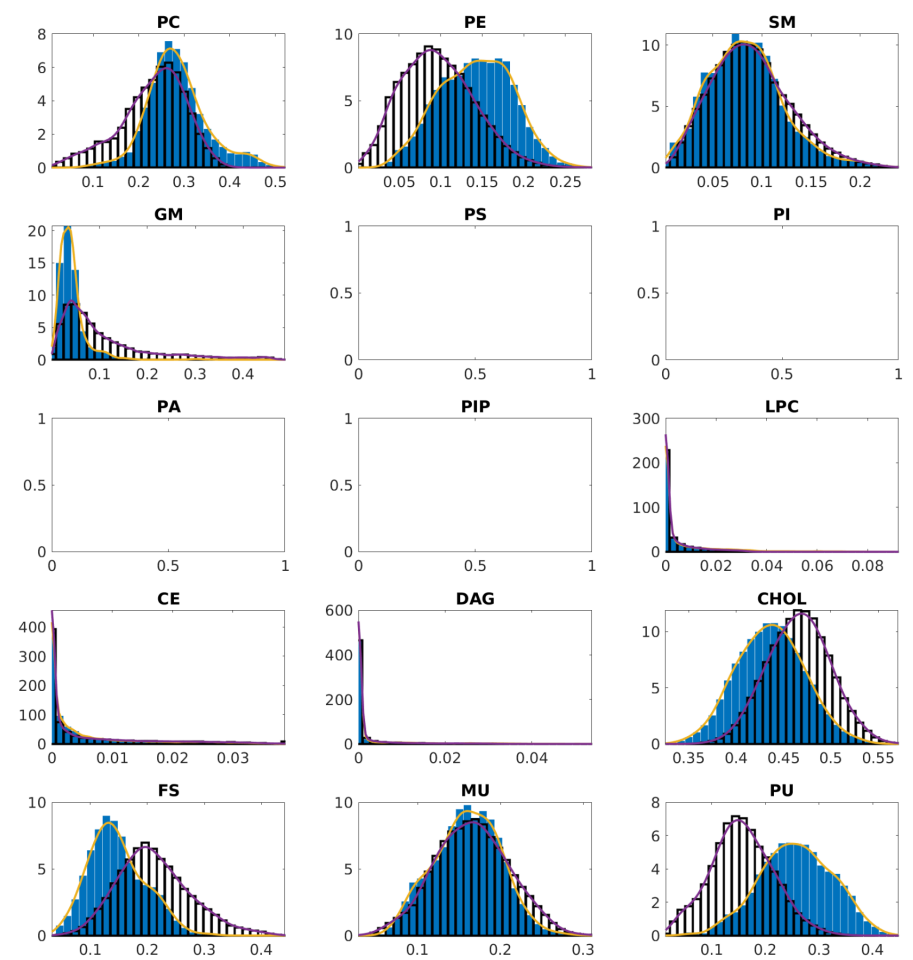

Supplement: supp [file elife-74773-supp-v1.zip › elife_poa_e74773_Figure_3_figure_supplement_2.pdf]
