# Supplementary material for: Identification of electroporation sites in the complex lipid organization of the plasma membrane
Source: eLife journal article supplement (doi:10.7554/elife.74773), 2022-02-23
Supplement: supp [file elife-74773-supp-v1.zip]

Archive with 11 entries (11 files):
- elife_poa_e74773_Transparent_Reporting_File.docx
- elife_poa_e74773_Figure_1_figure_supplement_1.pdf
- elife_poa_e74773_Figure_3_figure_supplement_1.pdf
- elife_poa_e74773_Figure_3_figure_supplement_2.pdf
- elife_poa_e74773_Figure_3_figure_supplement_3.pdf
- elife_poa_e74773_Figure_5_figure_supplement_1.pdf
- elife_poa_e74773_Figure_5_figure_supplement_2.pdf
- elife_poa_e74773_Figure_5_figure_supplement_3.pdf
- elife_poa_e74773_Figure_5_figure_supplement_4.pdf
- elife_poa_e74773_Figure_5_figure_supplement_5.pdf
- elife_poa_e74773_Figure_5_figure_supplement_6.pdf
