# Supplementary material for: Identification of electroporation sites in the complex lipid organization of the plasma membrane
Source: eLife journal article supplement (doi:10.7554/elife.74773), 2022-02-23

Combining same membrane and same Efield

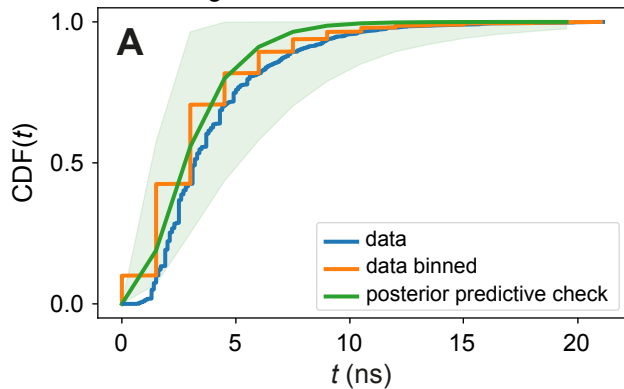

Separating individual simulations

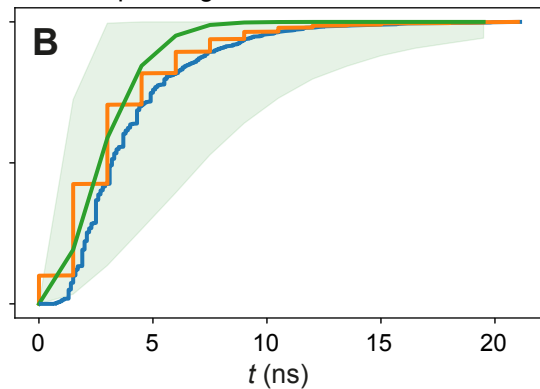Time-dependent  $\beta$ 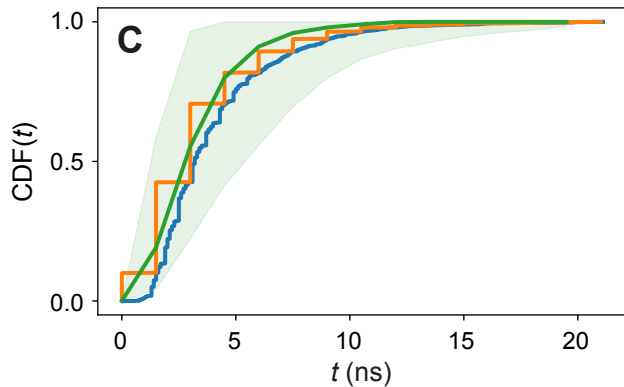

Supplement: supp [file elife-74773-supp-v1.zip › elife_poa_e74773_Figure_5_figure_supplement_1.pdf]
