# Supplementary figures and images for: Identification of electroporation sites in the complex lipid organization of the plasma membrane
Source: eLife journal article supplement (doi:10.7554/elife.74773), 2022-02-23

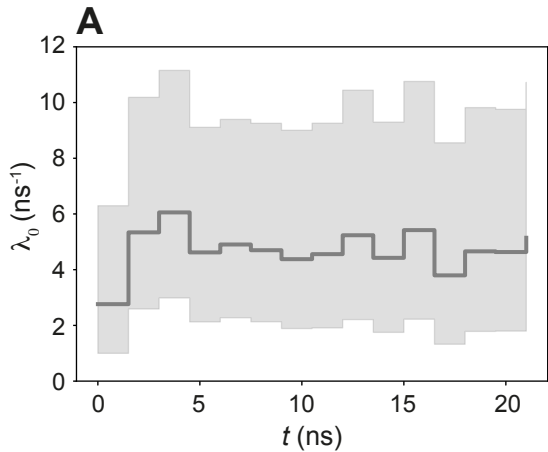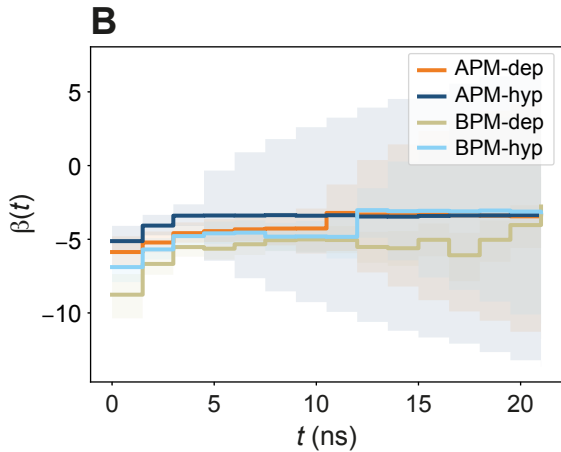

Supplement: supp [file elife-74773-supp-v1.zip]

**APM Outer Leaflet**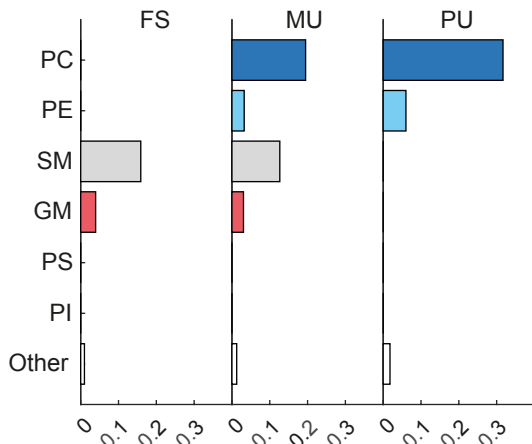**BPM Outer Leaflet**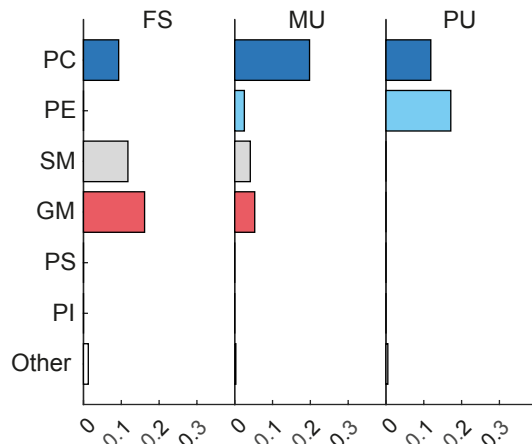**APM Inner Leaflet**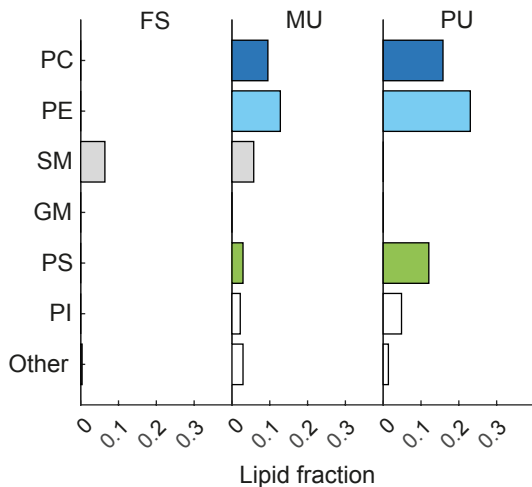**BPM Inner Leaflet**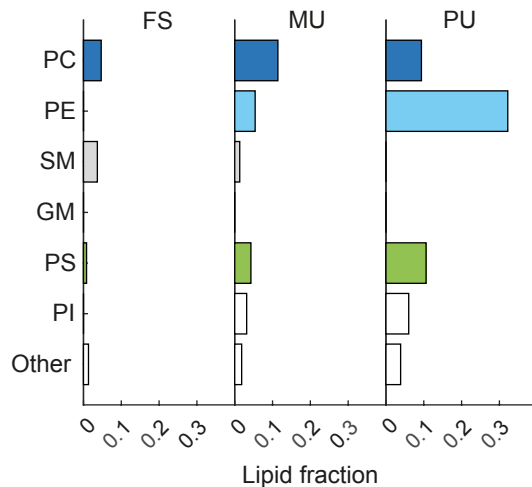

Supplement: supp [file elife-74773-supp-v1.zip › elife_poa_e74773_Figure_1_figure_supplement_1.pdf]

**A**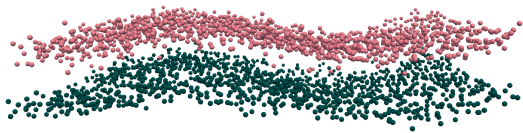**B**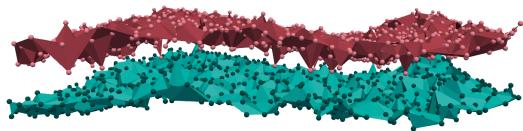**C**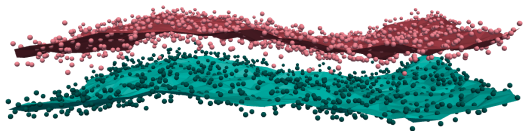**D**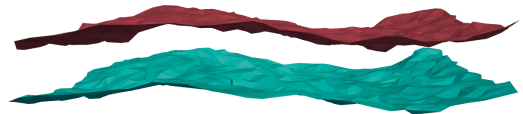**E**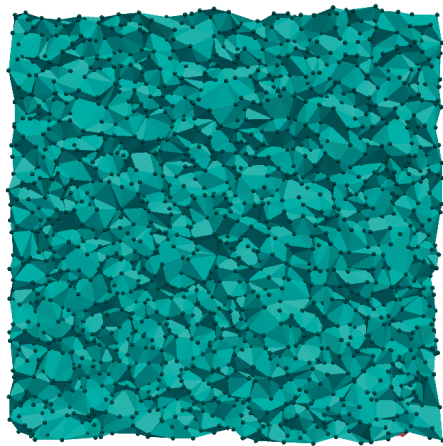**F**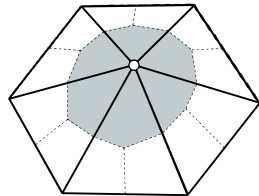

Supplement: supp [file elife-74773-supp-v1.zip › elife_poa_e74773_Figure_3_figure_supplement_1.pdf]

## No electric field applied

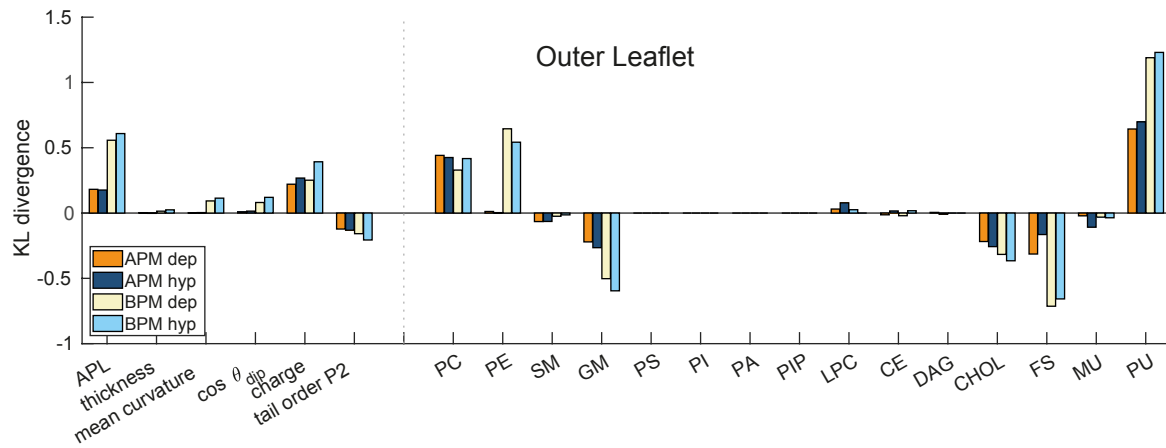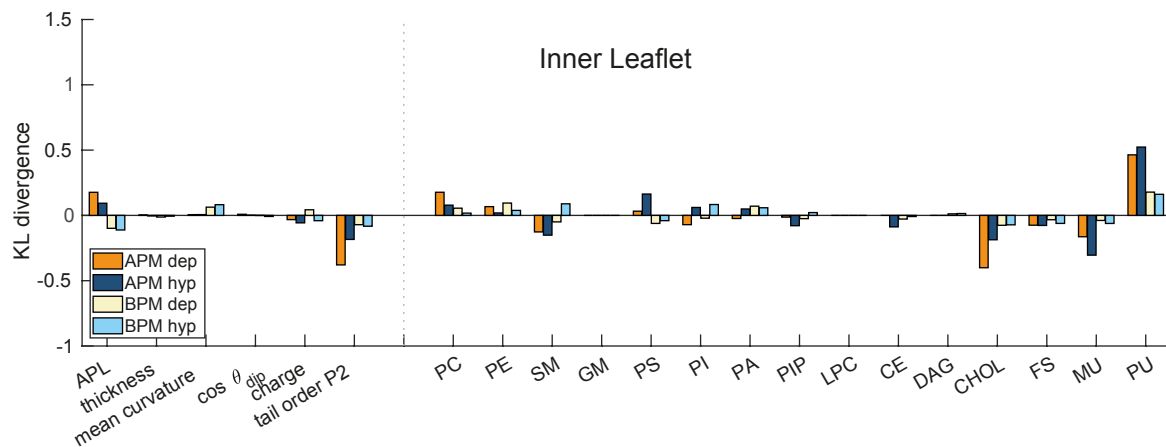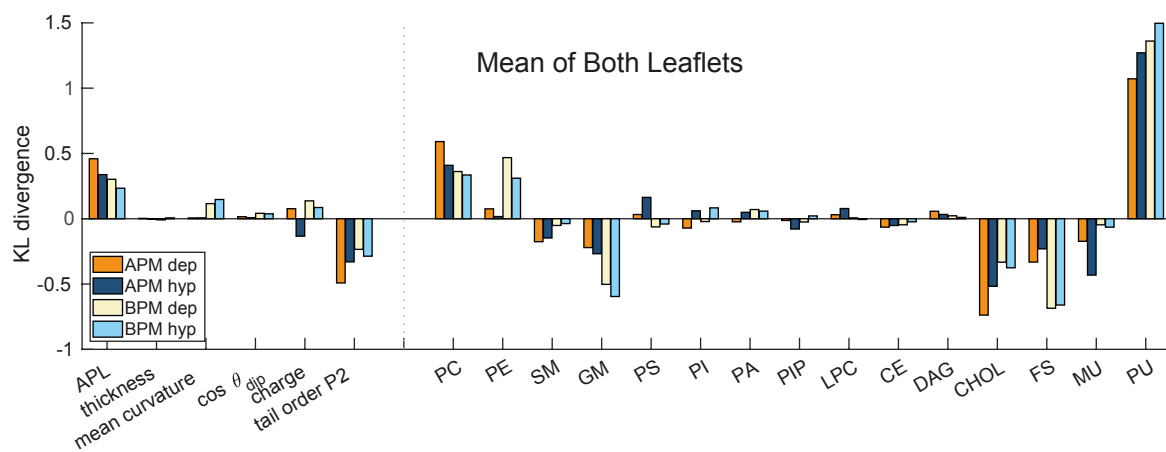

## Nonporating electric field applied

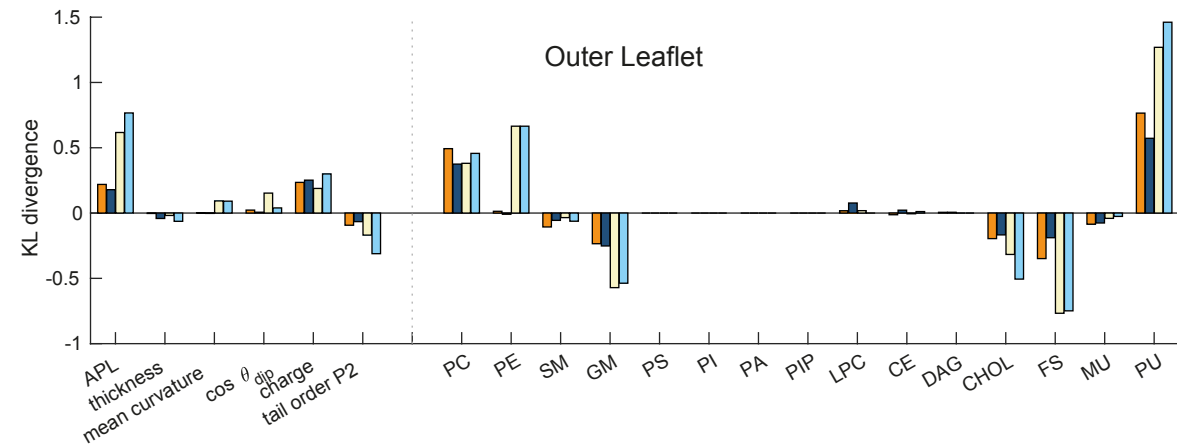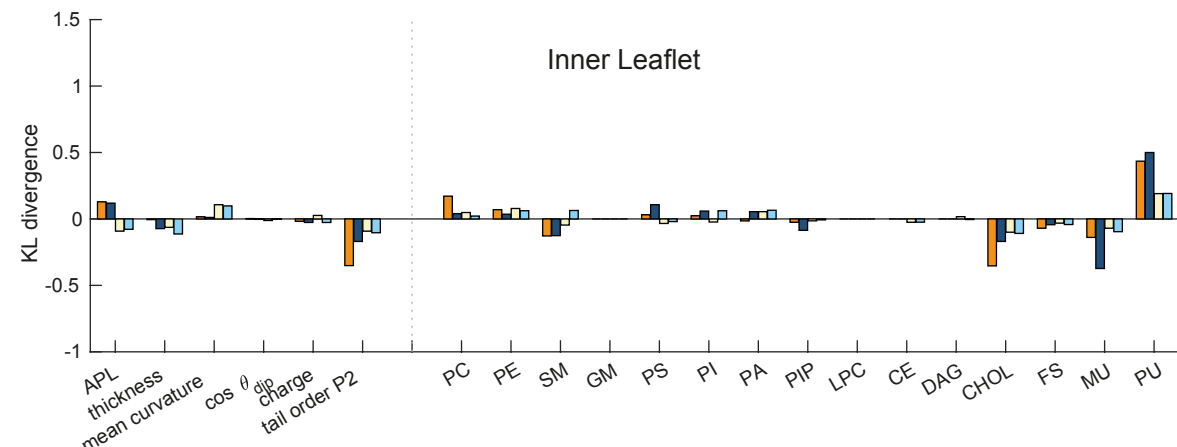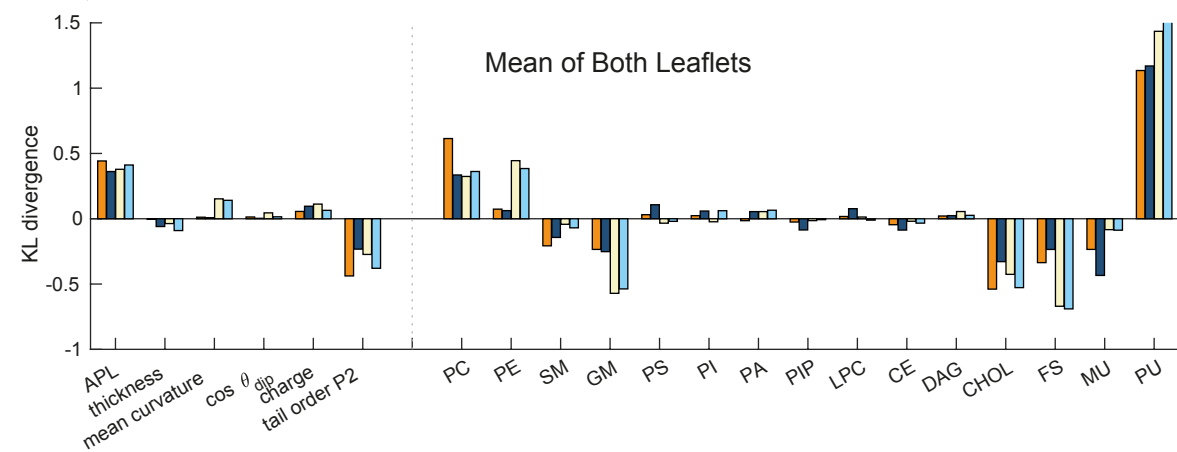

Supplement: supp [file elife-74773-supp-v1.zip › elife_poa_e74773_Figure_3_figure_supplement_3.pdf]

# 94% Credible Intervals

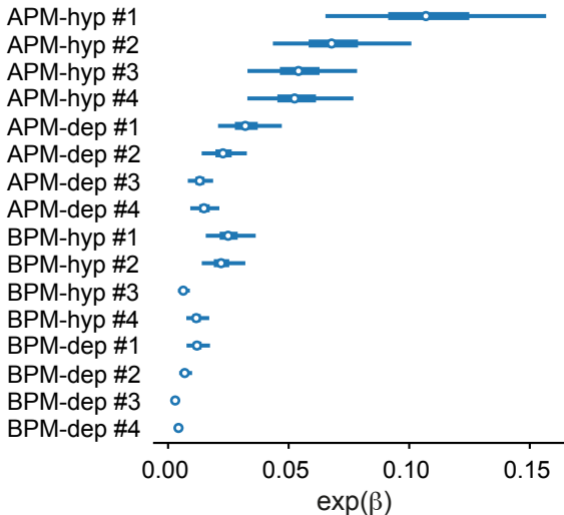

Supplement: supp [file elife-74773-supp-v1.zip › elife_poa_e74773_Figure_5_figure_supplement_3.pdf]

**APM #1**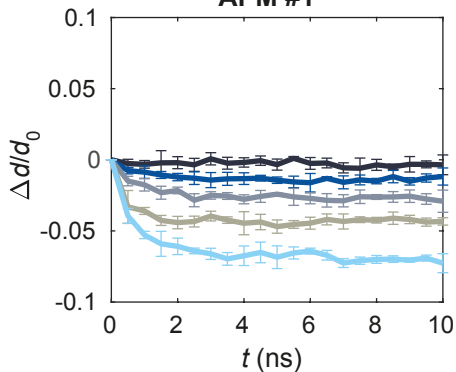**APM #1**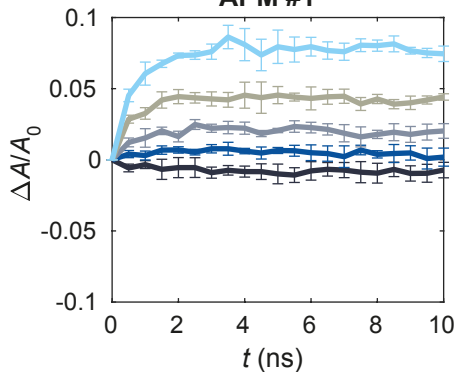

Legend:

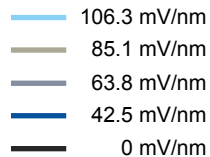**BPM #1**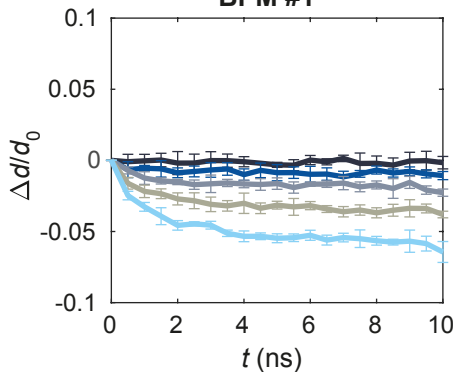**BPM #1**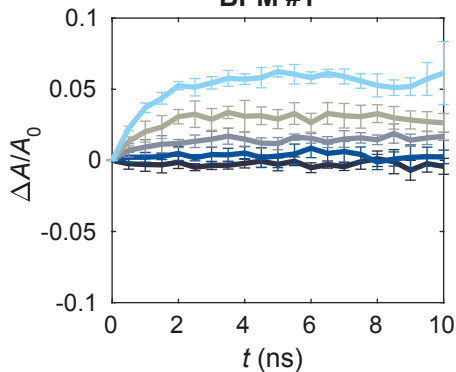

Supplement: supp [file elife-74773-supp-v1.zip › elife_poa_e74773_Figure_5_figure_supplement_4.pdf]

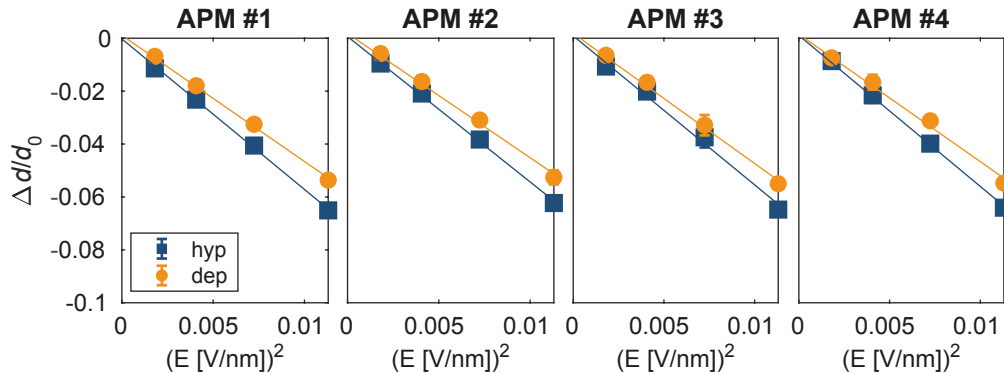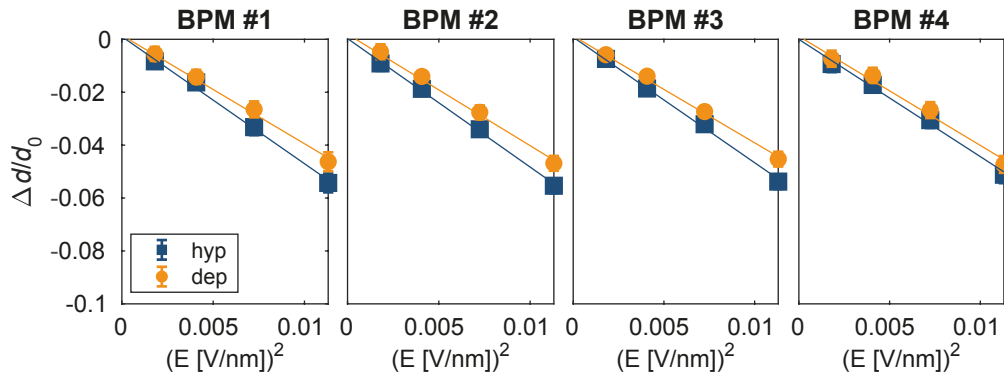

Supplement: supp [file elife-74773-supp-v1.zip › elife_poa_e74773_Figure_5_figure_supplement_5.pdf]

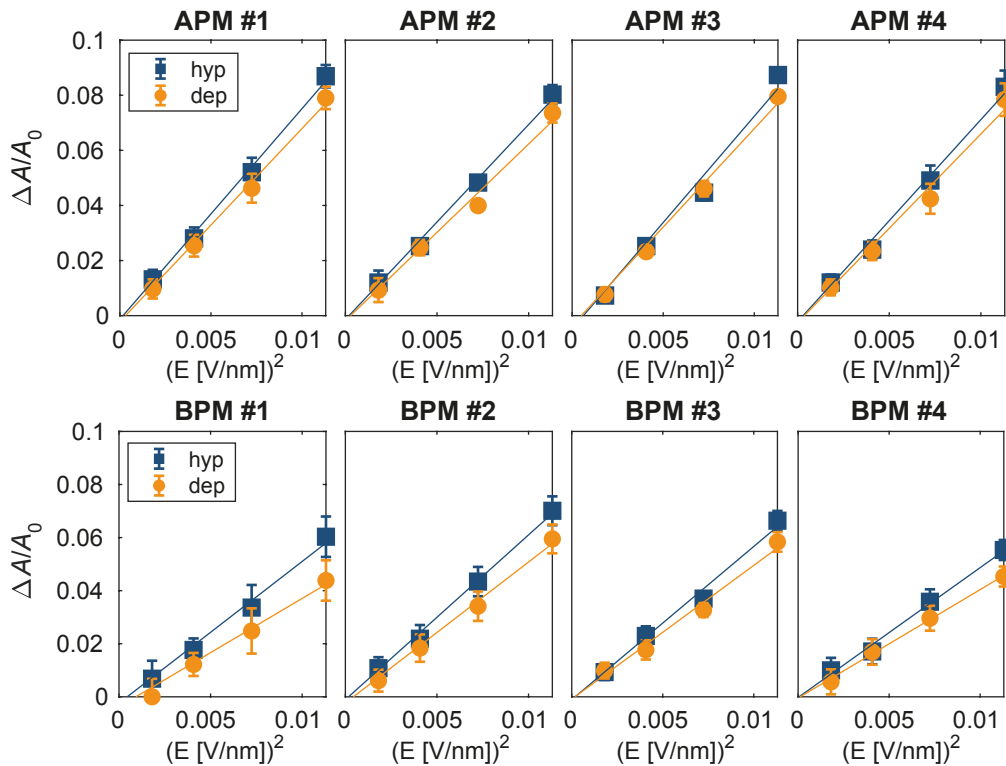

Supplement: supp [file elife-74773-supp-v1.zip › elife_poa_e74773_Figure_5_figure_supplement_6.pdf]
